# Supplementary material for: Revisiting telegony: offspring inherit an acquired characteristic of their mother's previous mate
Source: PubMed Central journal article supplement (PMC4282758; doi:10.1111/ele.12373), 2014-09-30

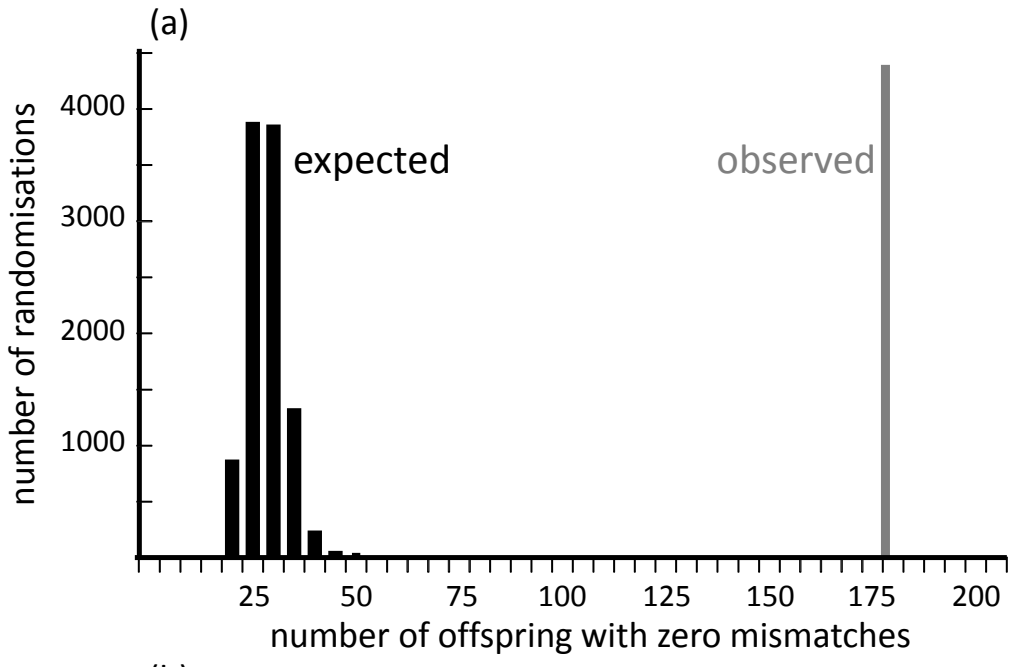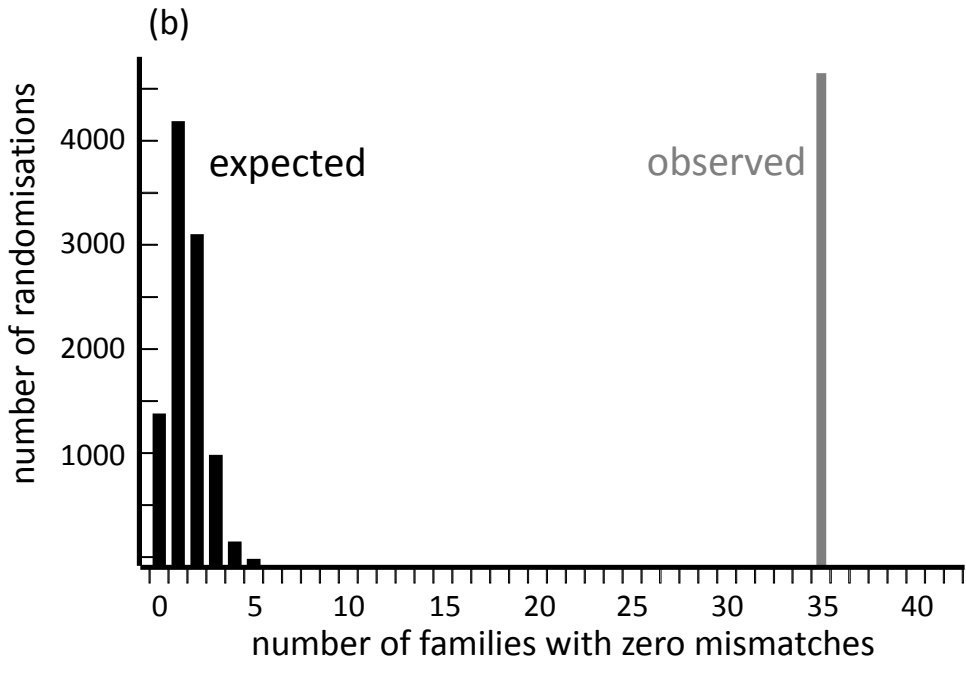

Supplement: ele0017-1545-sd4.pdf [file ele0017-1545-sd4.pdf]
